# Supplementary material
Source: ML conference proceedings conference paper supplement (https://openreview.net/forum?id=95ObXevgHx)
Supplement: supplementary_material [file attachment]

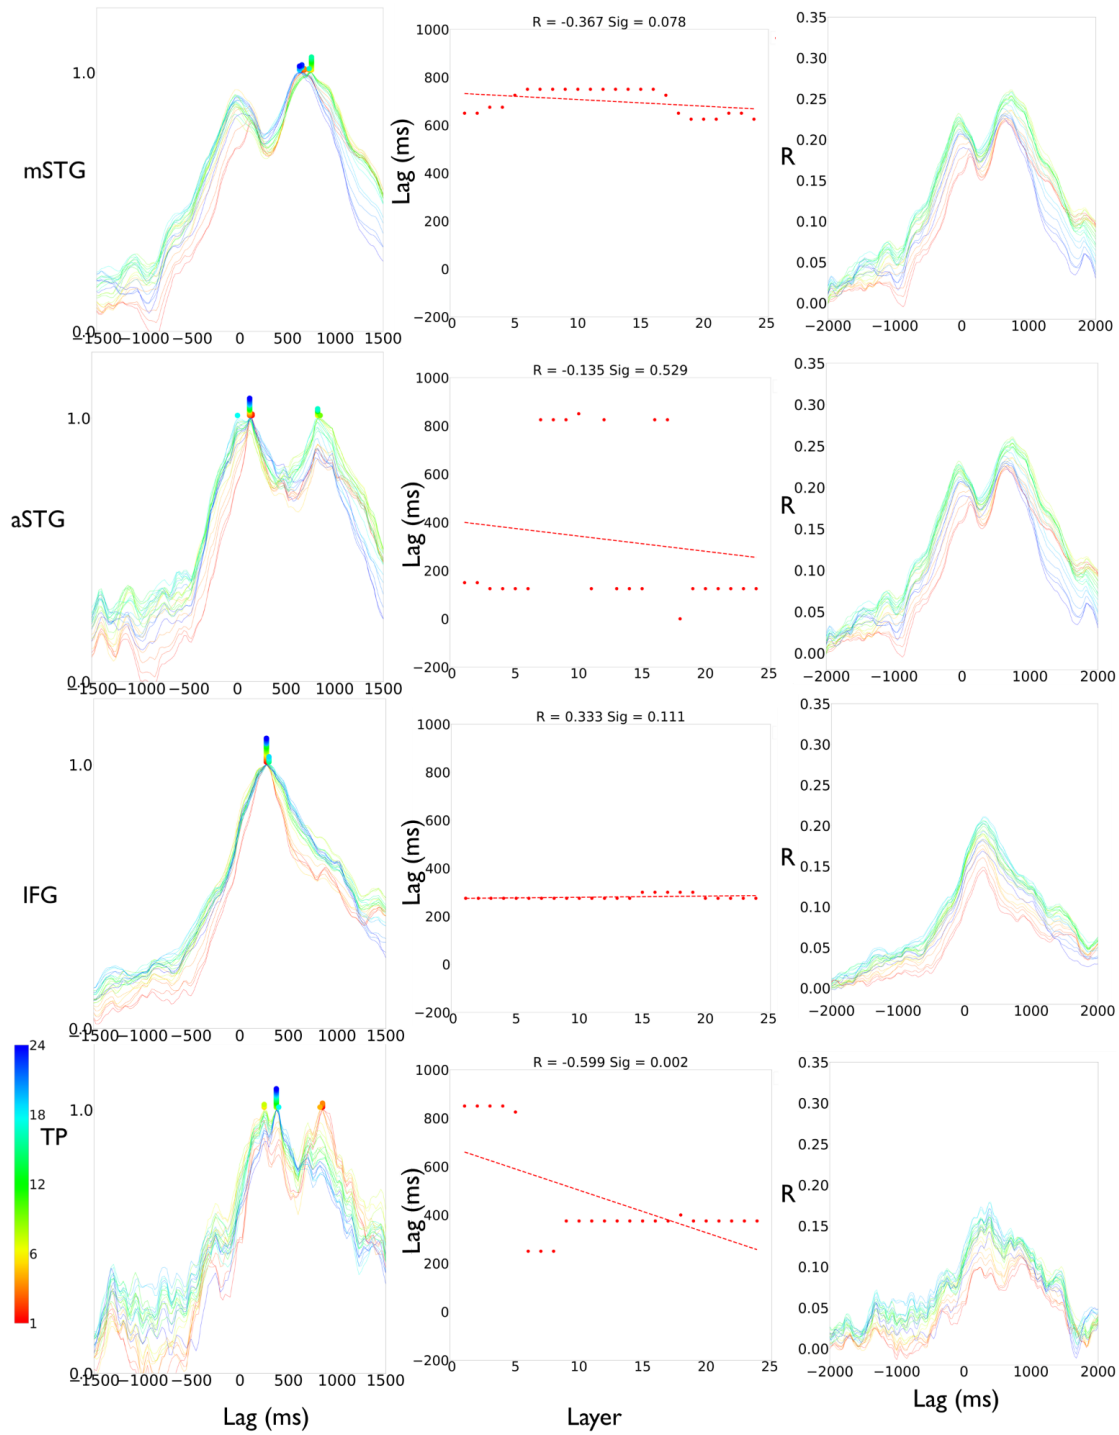

**Supplementary Figure S1:** Left to right: Scaled encoding, lag-layer and regular encoding plots for Bert large embeddings across ROIs. The y-axis for the regular encoding plot is correlation. The y-axis of the lag layer plot is lag (ms). The words used to train the encoding model were the predictable words.

## GPT2-XL With Different Context Lengths

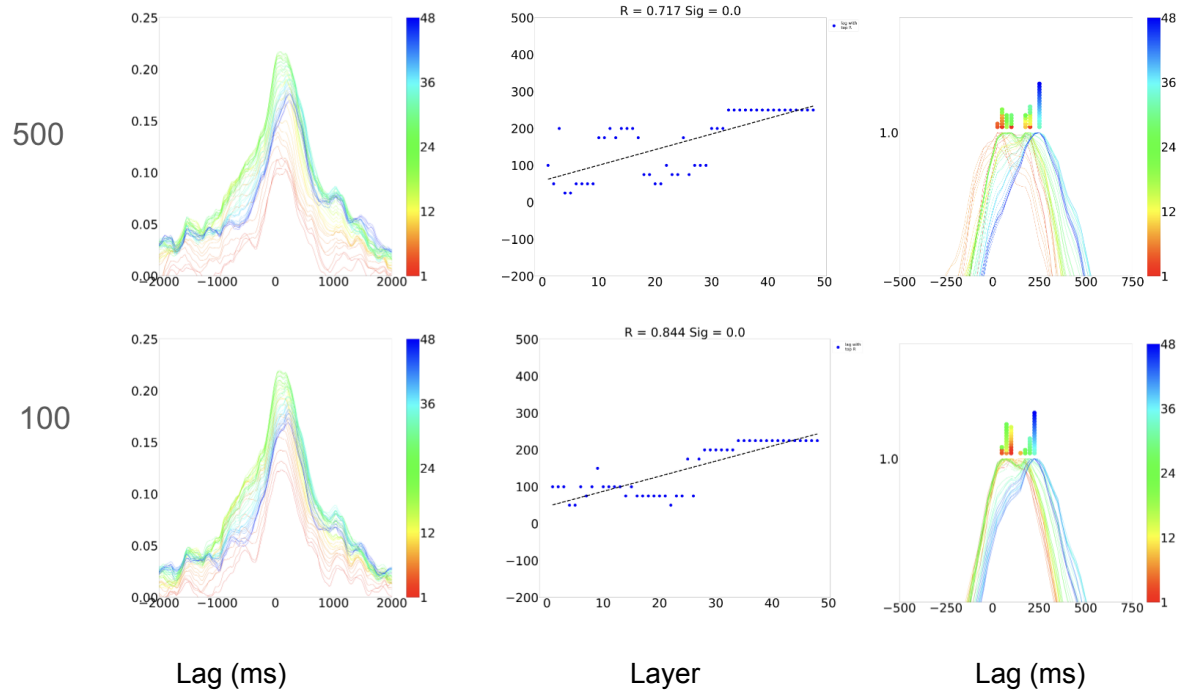

**Supplementary Figure S2:** Left to right: Encoding, lag layer and scaled encoding plots when GPT2-XL is given input sizes of 500 and 100 words. The y-axis for the regular encoding plot is correlation. The y-axis of the lag layer plot is lag (ms). The ROI observed is the IFG and the encoding model was trained on predictable words.

## Encoding and Lag Layer Performance Using Embeddings for Adjacent Words

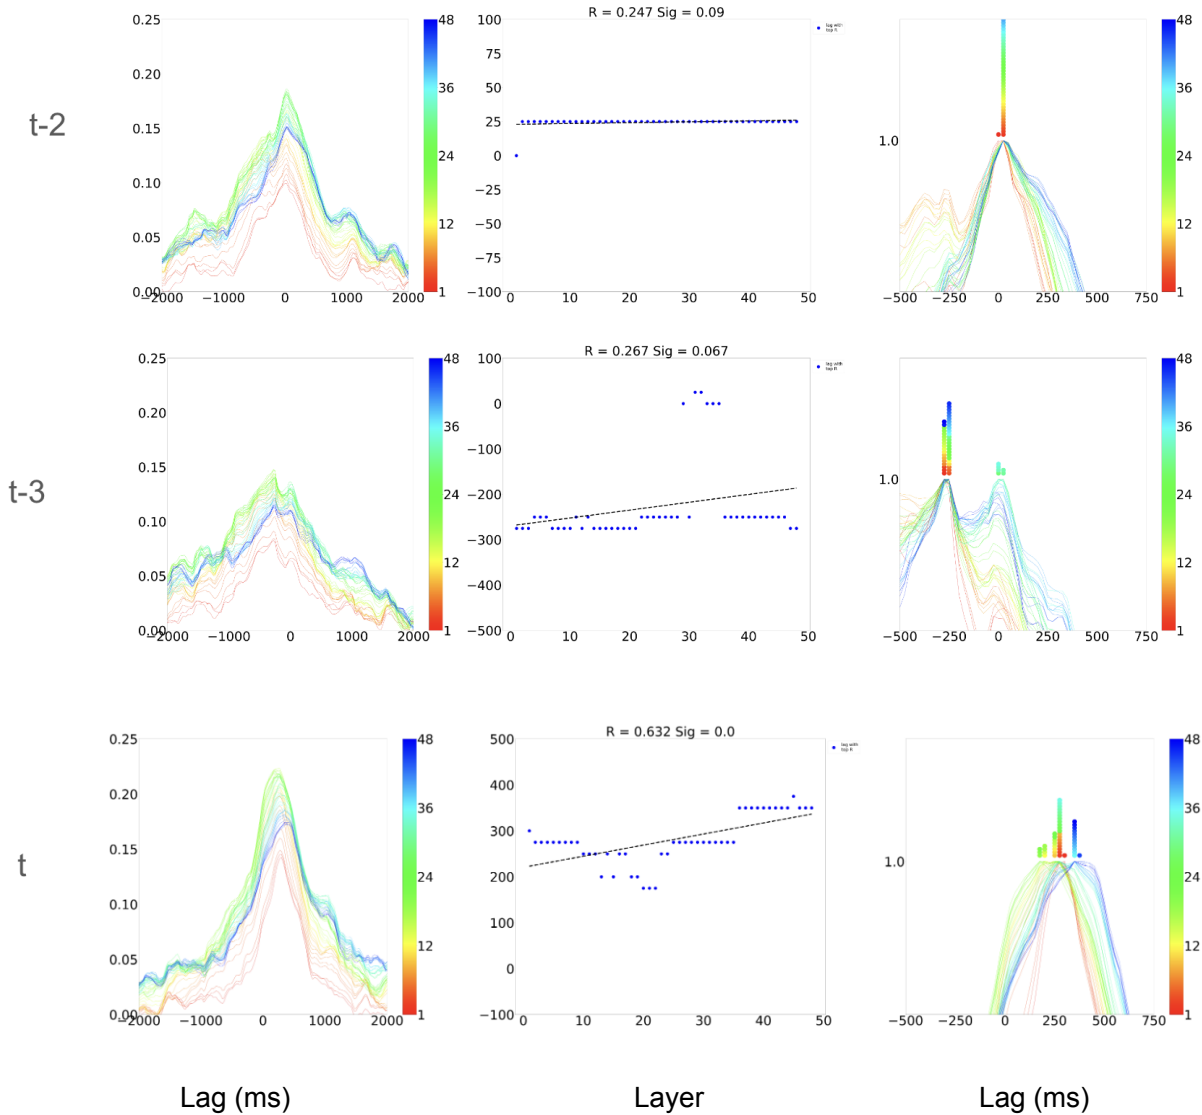

**Supplementary Figure S3:** Left to right: regular encoding, lag-layer and scaled encoding plots for the IFG and predictable words where the encoding model was given different words for the same neural signal.  $T-1$  is what we have in our paper, which is the embedding generated when GPT2-XL is given all words up until the current word.  $T-2$  is when the embedding is from the prior word.  $T-3$  is the embedding before that.  $T$  is when the embedding is the prediction GPT2-XL makes when given the context up until and including the current word. The y-axis for the regular encoding plot is correlation. The y-axis of the lag layer plot is lag (ms).

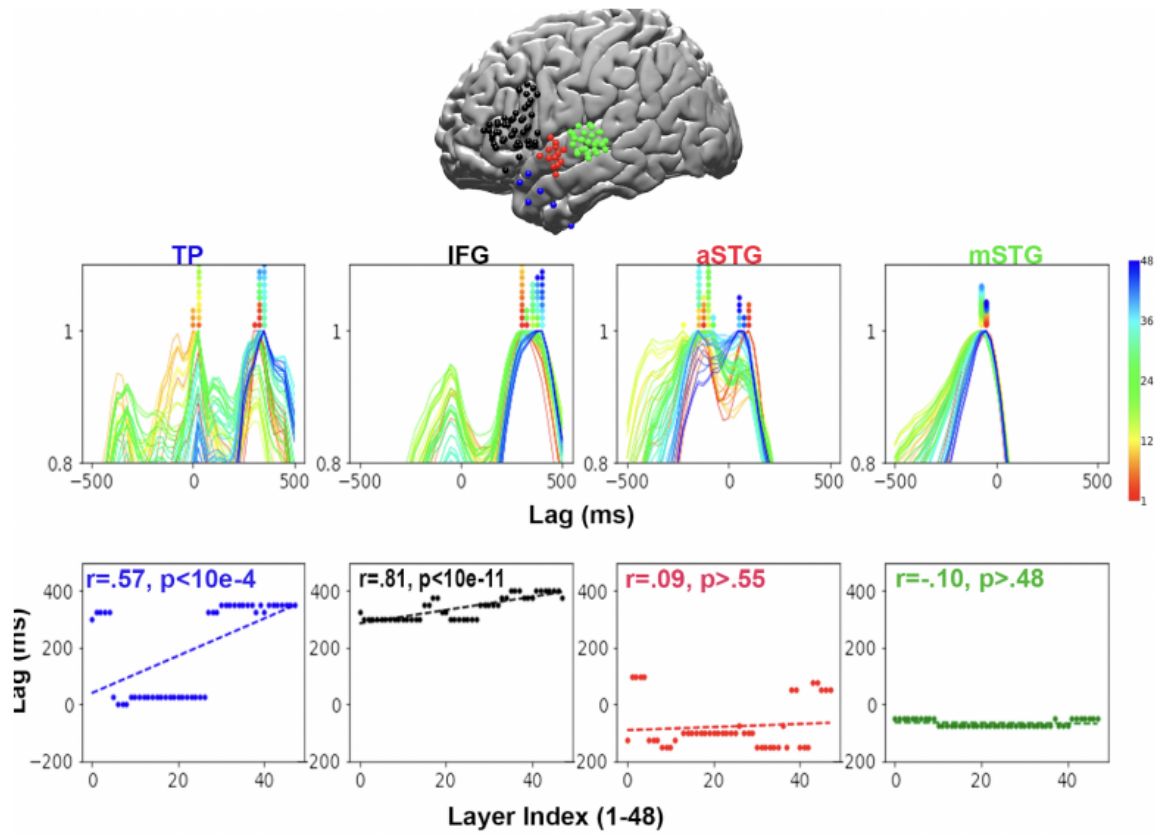

**Supplementary Figure S4:** Temporal hierarchy along the ventral language stream for unpredictable words. (Top) location of electrodes on the brain, color coded by ROI with blue, black, red, green corresponding to TP, IFG, aSTG and mSTG respectively. (Middle) Scaled encoding performance for these ROIs. (Bottom) Scatter plot of the lag that yields peak encoding performance for each layer.

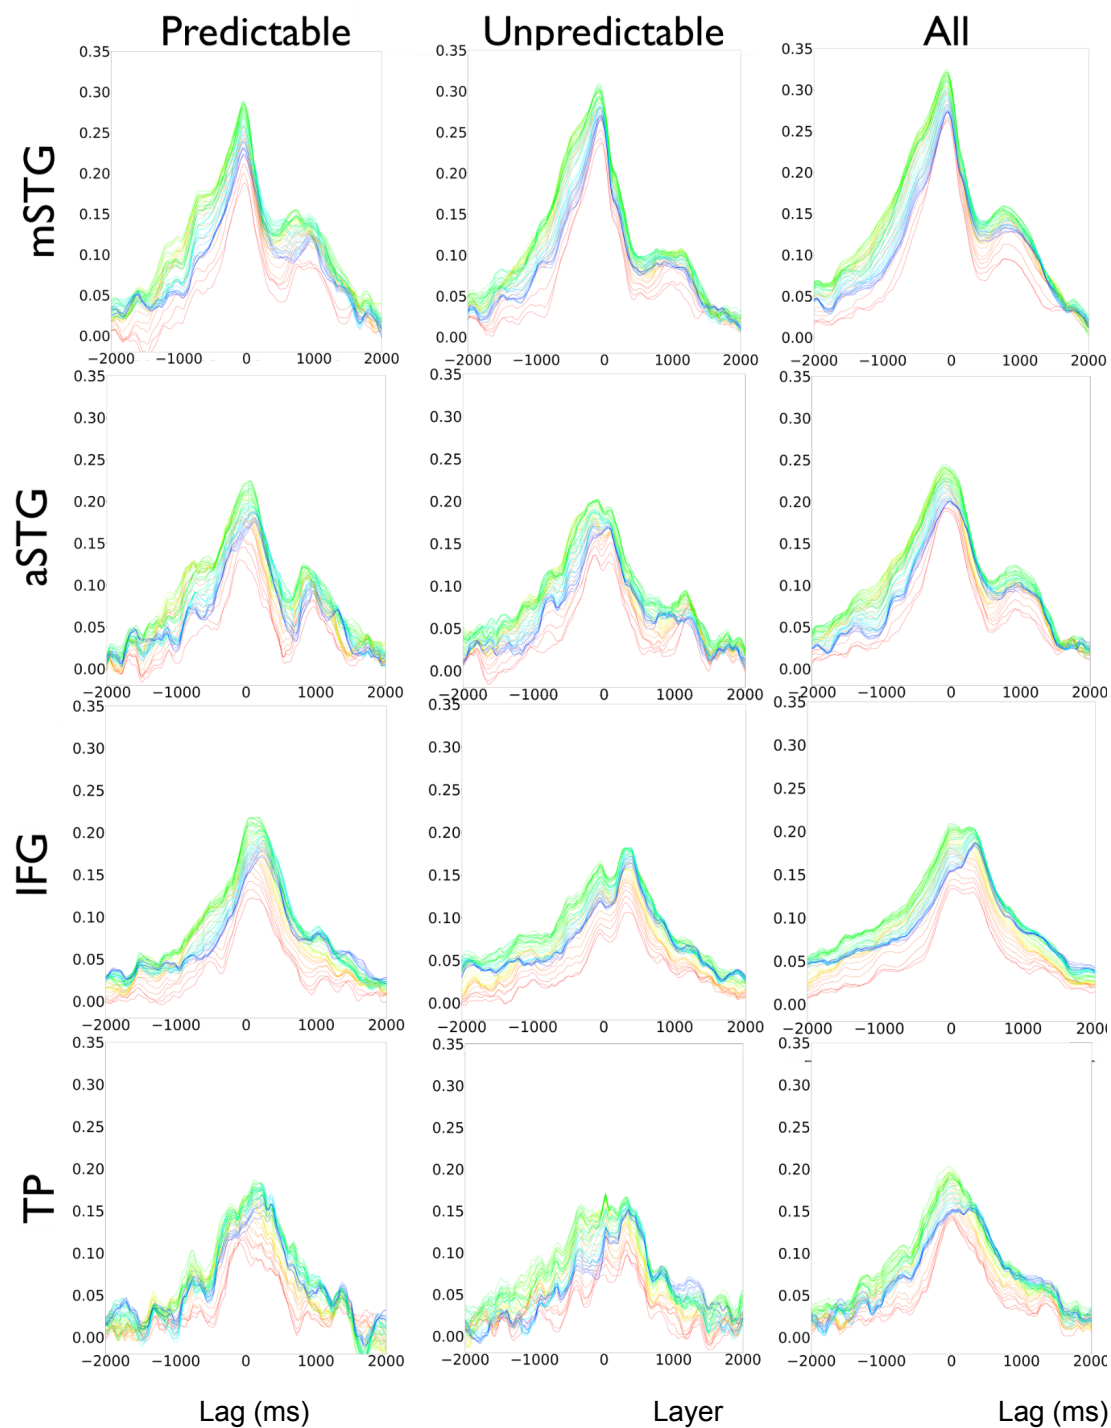

**Supplementary Figure S5:** Regular encoding plots for combinations of ROIs (mSTG, aSTG, IFG, TP) and word predictability (predictable, unpredictable, all words). The y-axis for the regular encoding plot is correlation.

## Shuffle Y (signal) with respect to X (embedding)

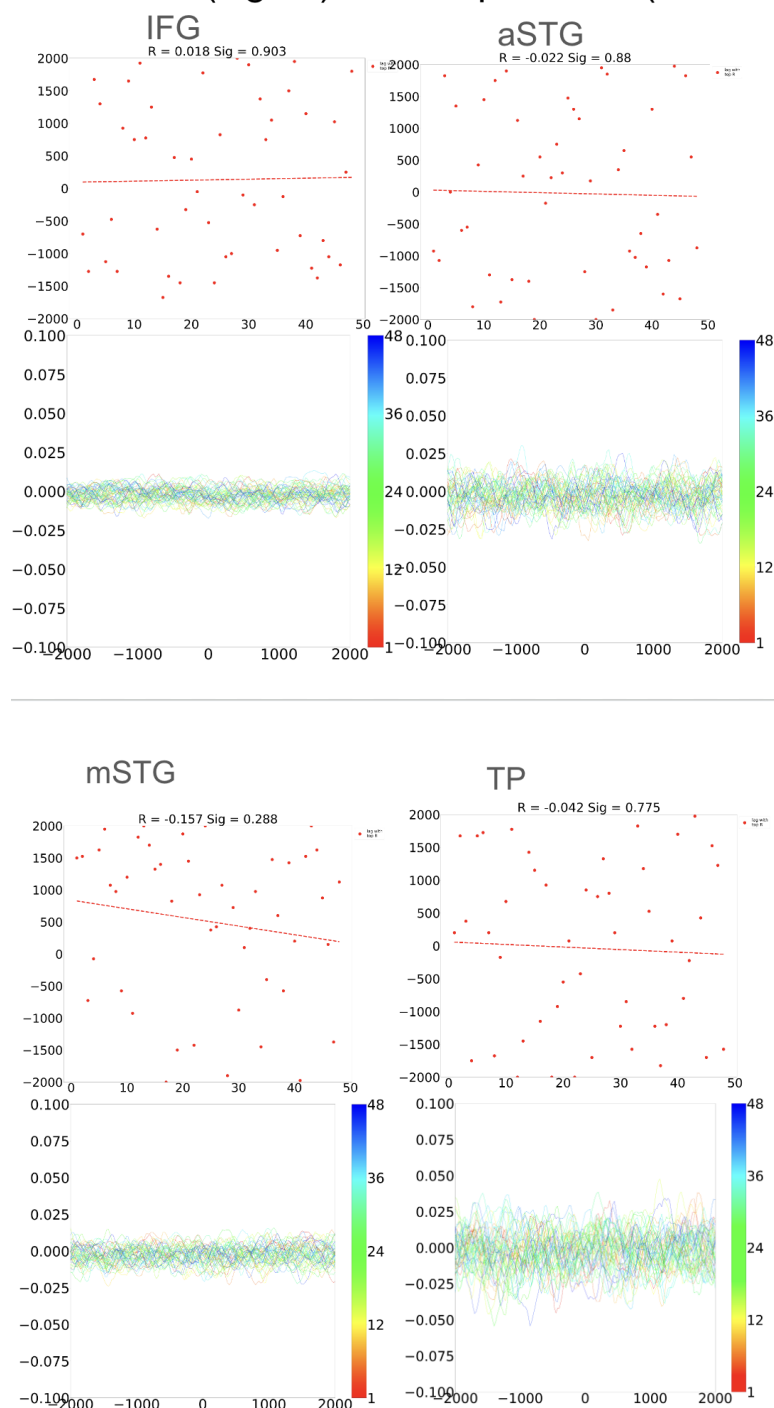

**Supplementary Figure S6:** Control analysis where, for each ROI we took all encoding training examples  $\{(X_i, Y_i)\}$ , where  $i = 1, \dots$ , number of predictable words,  $X_i$ : embedding of word  $i$ ,  $Y_i$ : neural signal centered at onset of word  $i$ . We shuffled the  $Y_i$ 's with respect to the  $X_i$ 's. We then re-ran our encoding analyses. The top player shows the result of plotting lag of maximal encoding correlation (y-axis) vs. layer (x-axis) and the bottom shows the encoding correlations for lags between -2000 ms and 2000 ms.

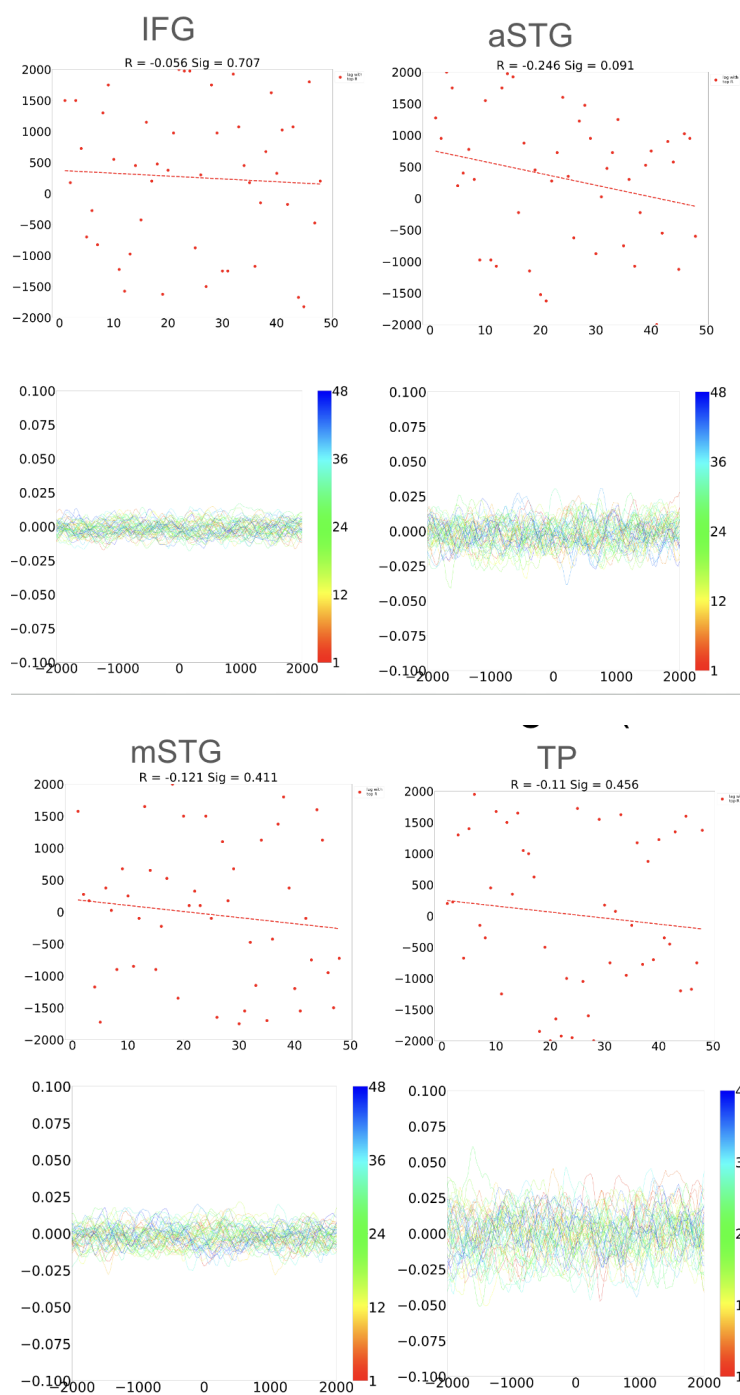

**Supplementary Figure S7:** Control analysis where, for each ROI we took all encoding training examples  $\{(X_i, Y_i)\}$ , where  $i = 1, \dots$ , number of predictable words  $X_i$ : embedding of word  $i$ ,  $Y_i$ : neural signal centered at onset of word  $i$ . We then phase shuffled the  $Y_i$ 's and re-ran our encoding analyses. The top player shows the result of plotting lag of maximal encoding correlation (y-axis) vs. layer (x-axis) and the bottom shows the encoding correlations for lags between -2000 ms and 2000 ms.

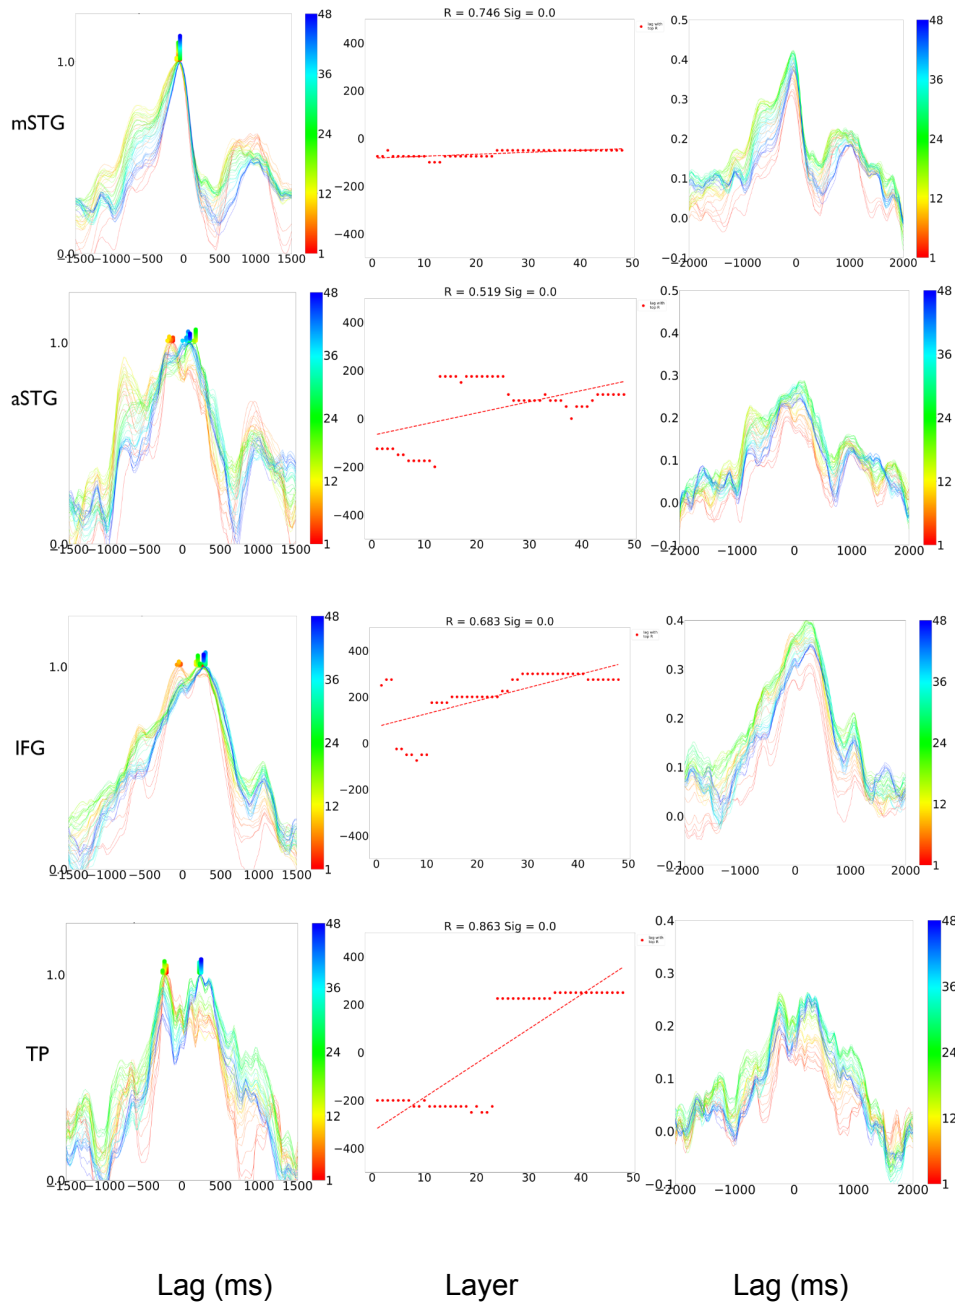

**Supplementary Figure S8:** Here we re-ran our analyses but trained a single encoding model per ROI, where it was tasked to predict the neural signal averaged over electrodes in that ROI. Left to right: regular encoding, lag-layer and scaled encoding plots for all ROIs, where the encoding model was trained on predictable words. The y-axis for the regular encoding plots is correlation and the y-axis for the lag-layer plots is lag in ms.



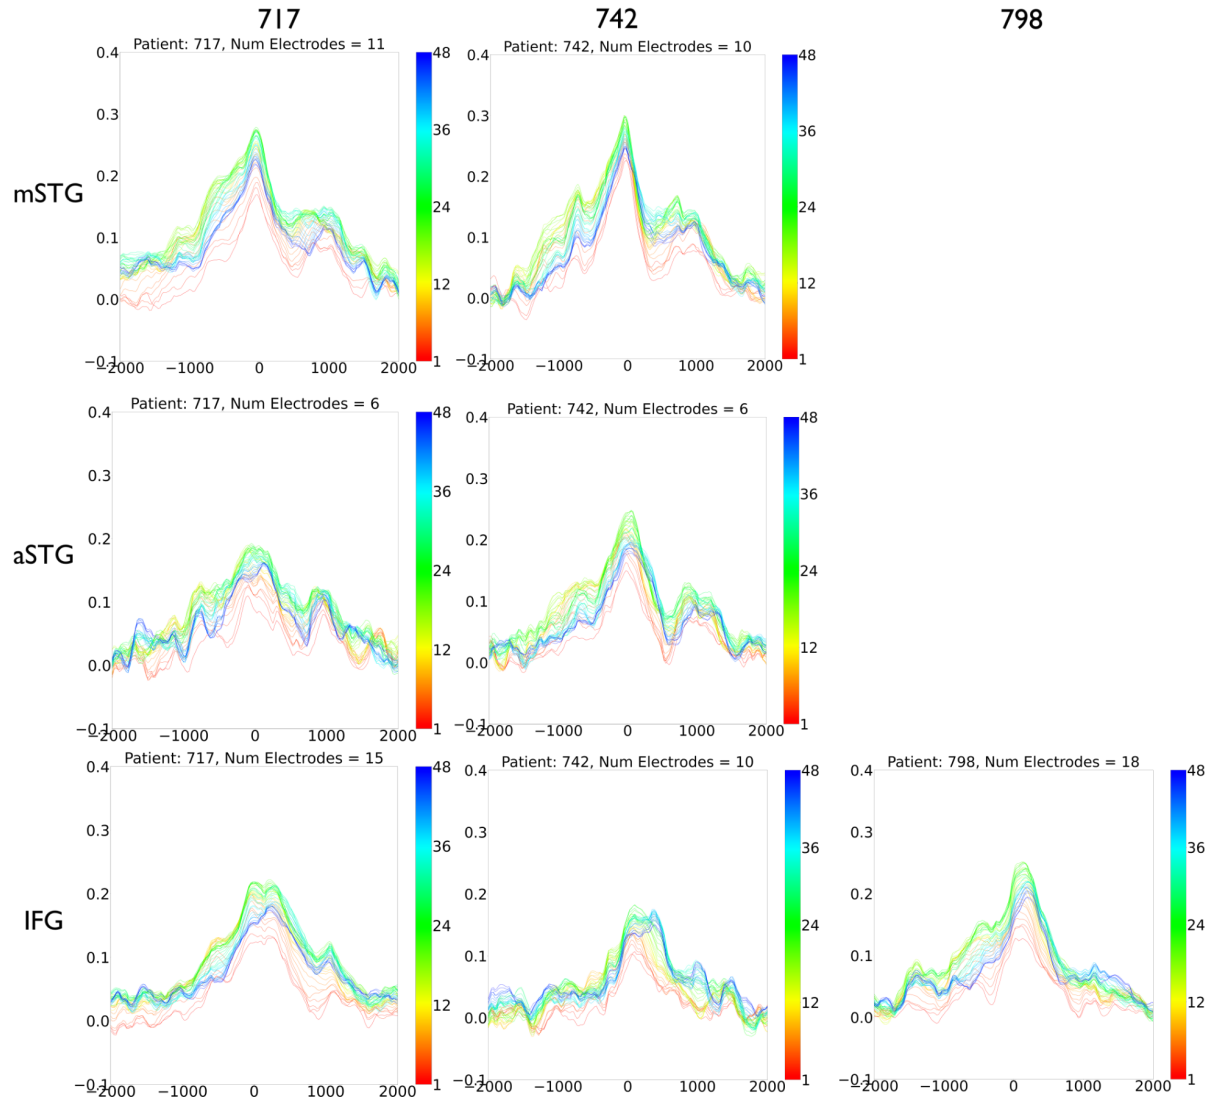

**Supplementary Figure S9:** Per-patient regular encoding results for patients 717, 742, 798, which were the only patients that had greater than 5 electrodes for any ROIs. No patient had 5 or more significant electrodes in the TP, so we omitted it from this analysis. Patient 798 only had 5 or more (18) electrodes in the IFG. For the numbers of electrodes for each patient-ROI combination, see the subplot titles. Y-axis is correlation.

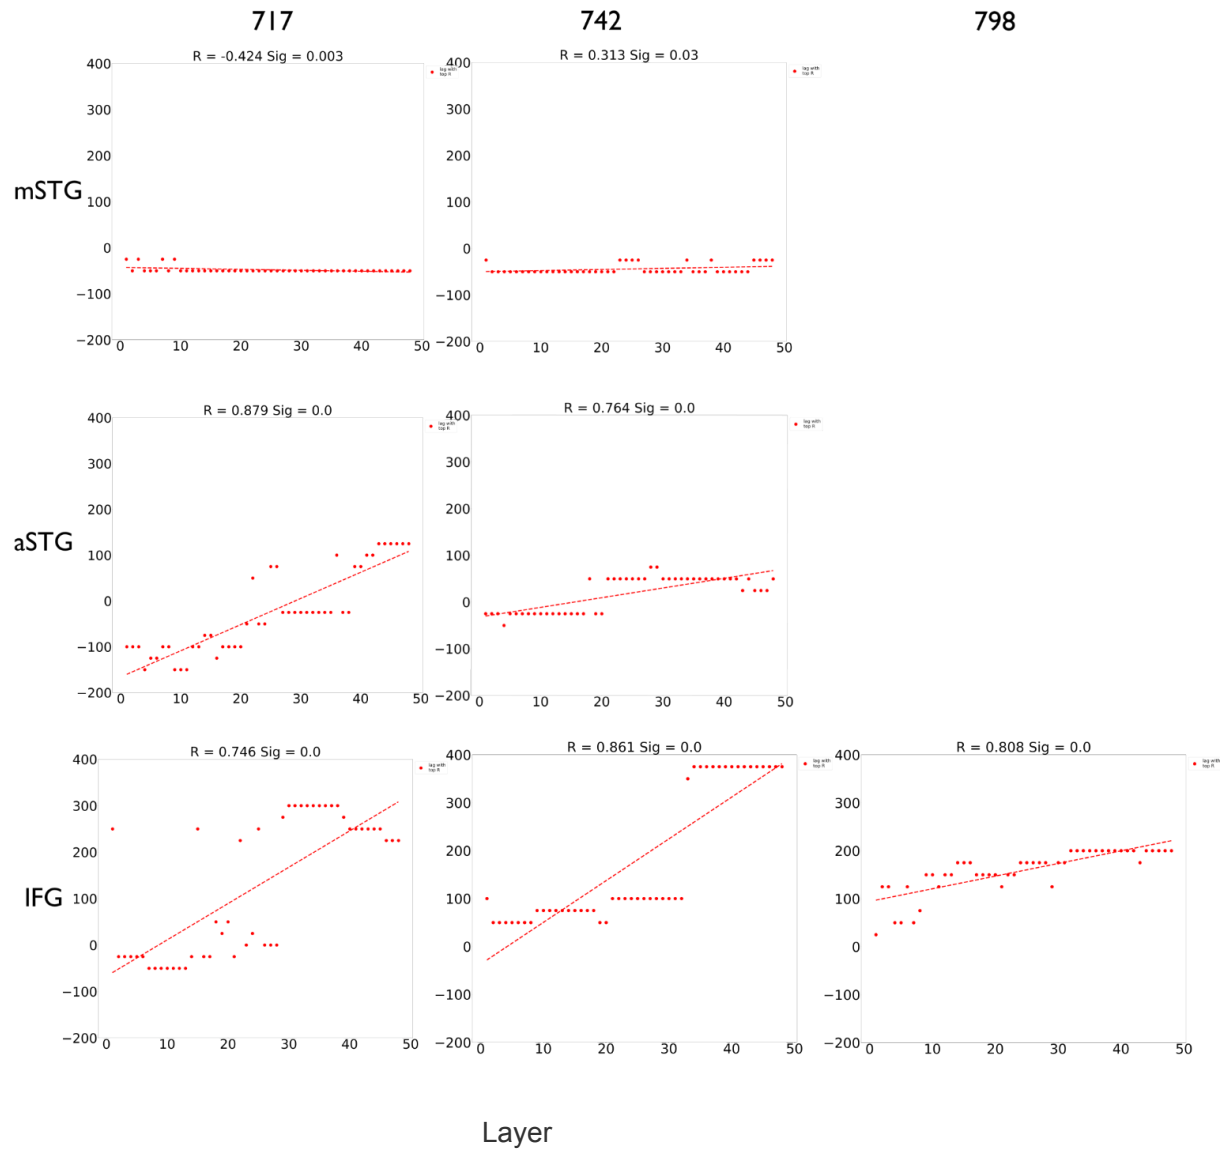

**Supplementary Figure S10:** Per-patient lag-layer results for patients 717, 742, 798. Y-axis is lag (ms).

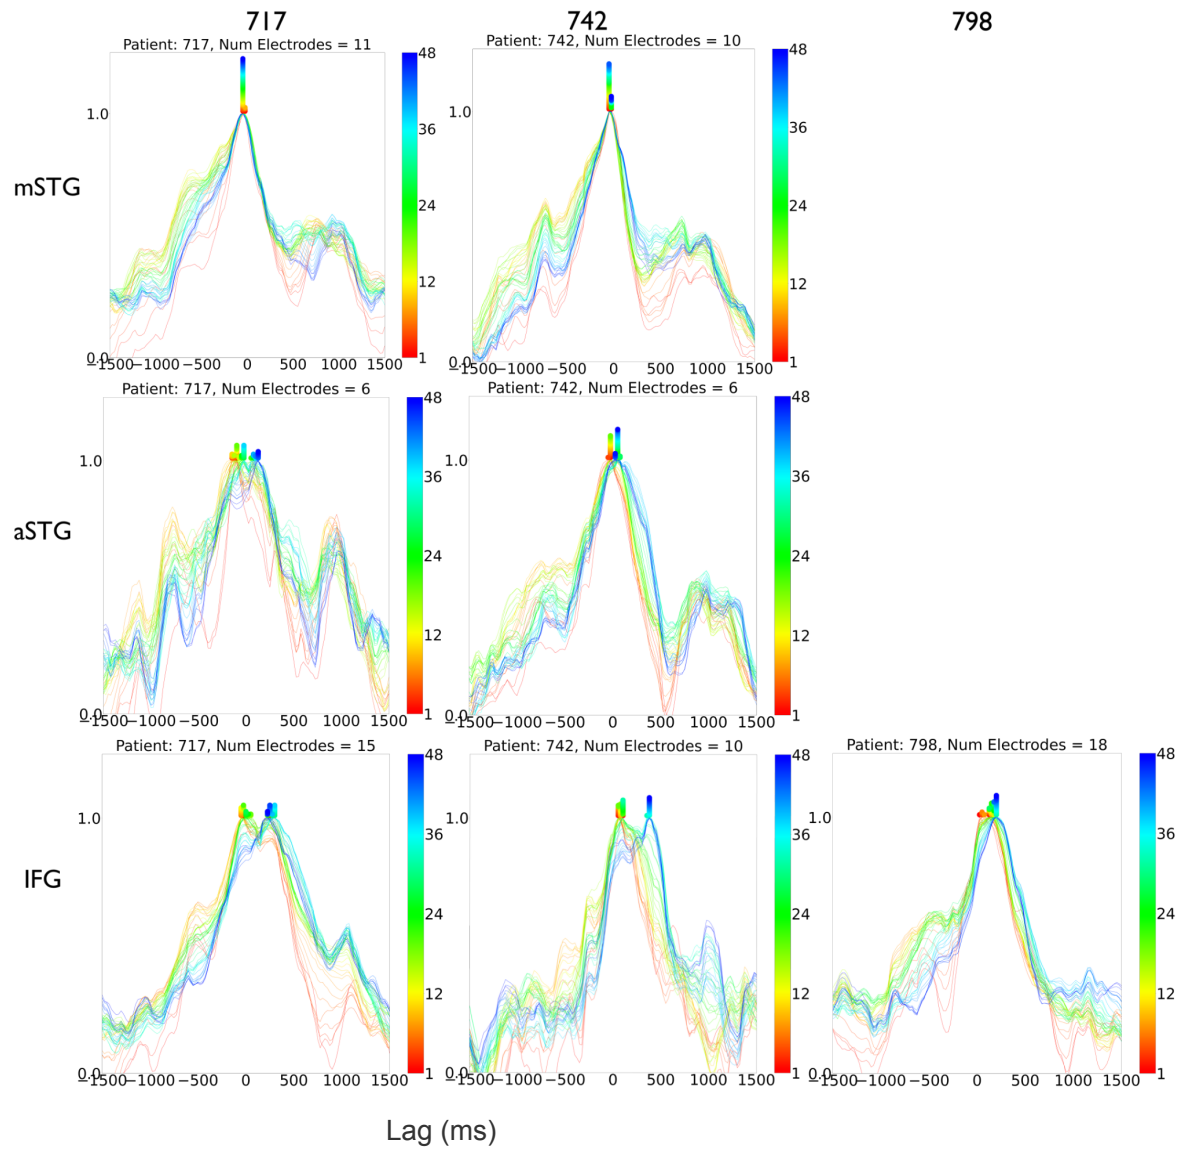

**Supplementary Figure S11:** Per-patient scaled encoding results for patients 717, 742, 798.

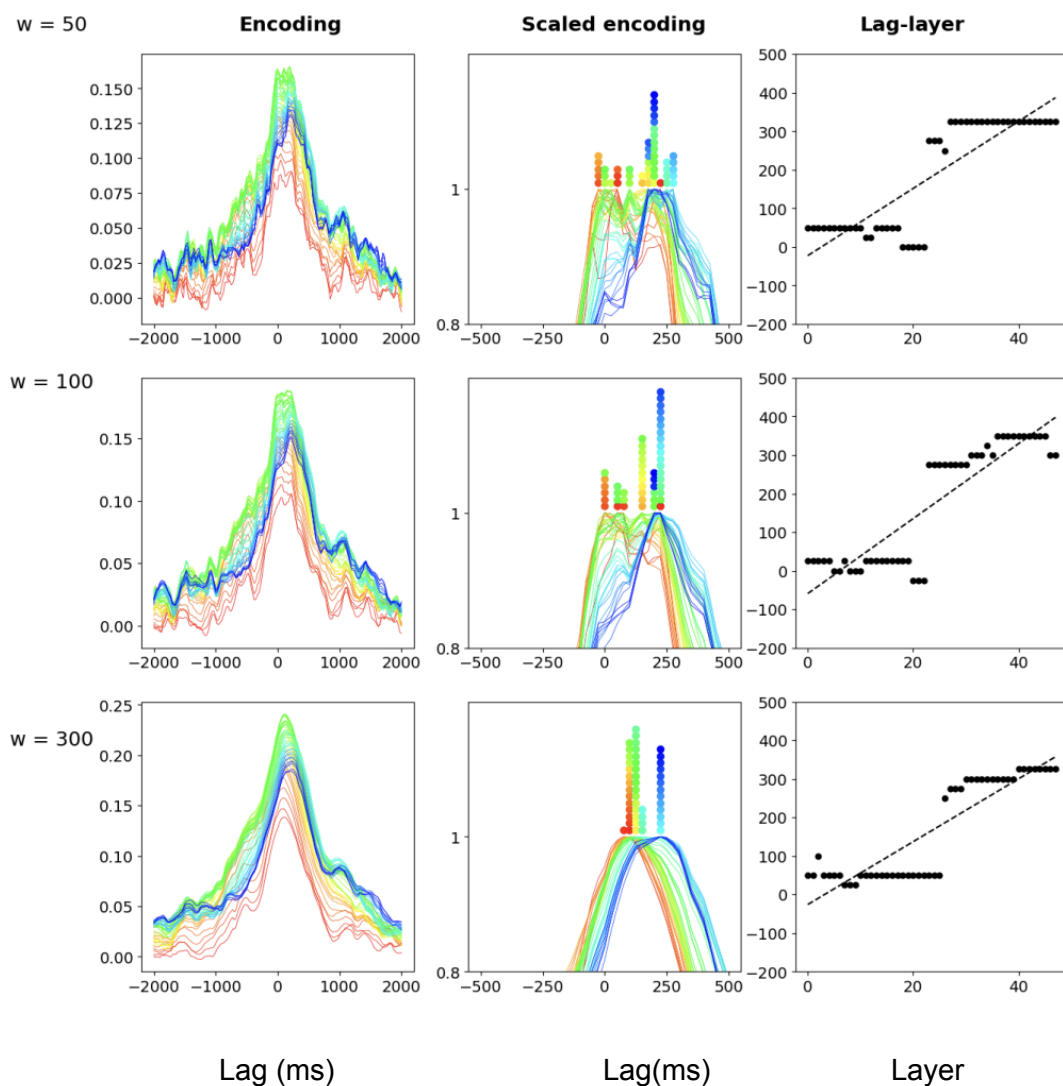

**Supplementary Figure S12:** We re-ran the regular encoding analysis, scaled encoding analysis and lag-layer analysis (left to right) for different smoothing window sizes applied to the neural signal (windows of 50, 100, 300). The correlations are all positive ( $r > 0.75$ ) and significant ( $p < 1e-10$ ). The y axis or regular encoding is correlation. The y-axis of the lag layer analysis is lag (ms).

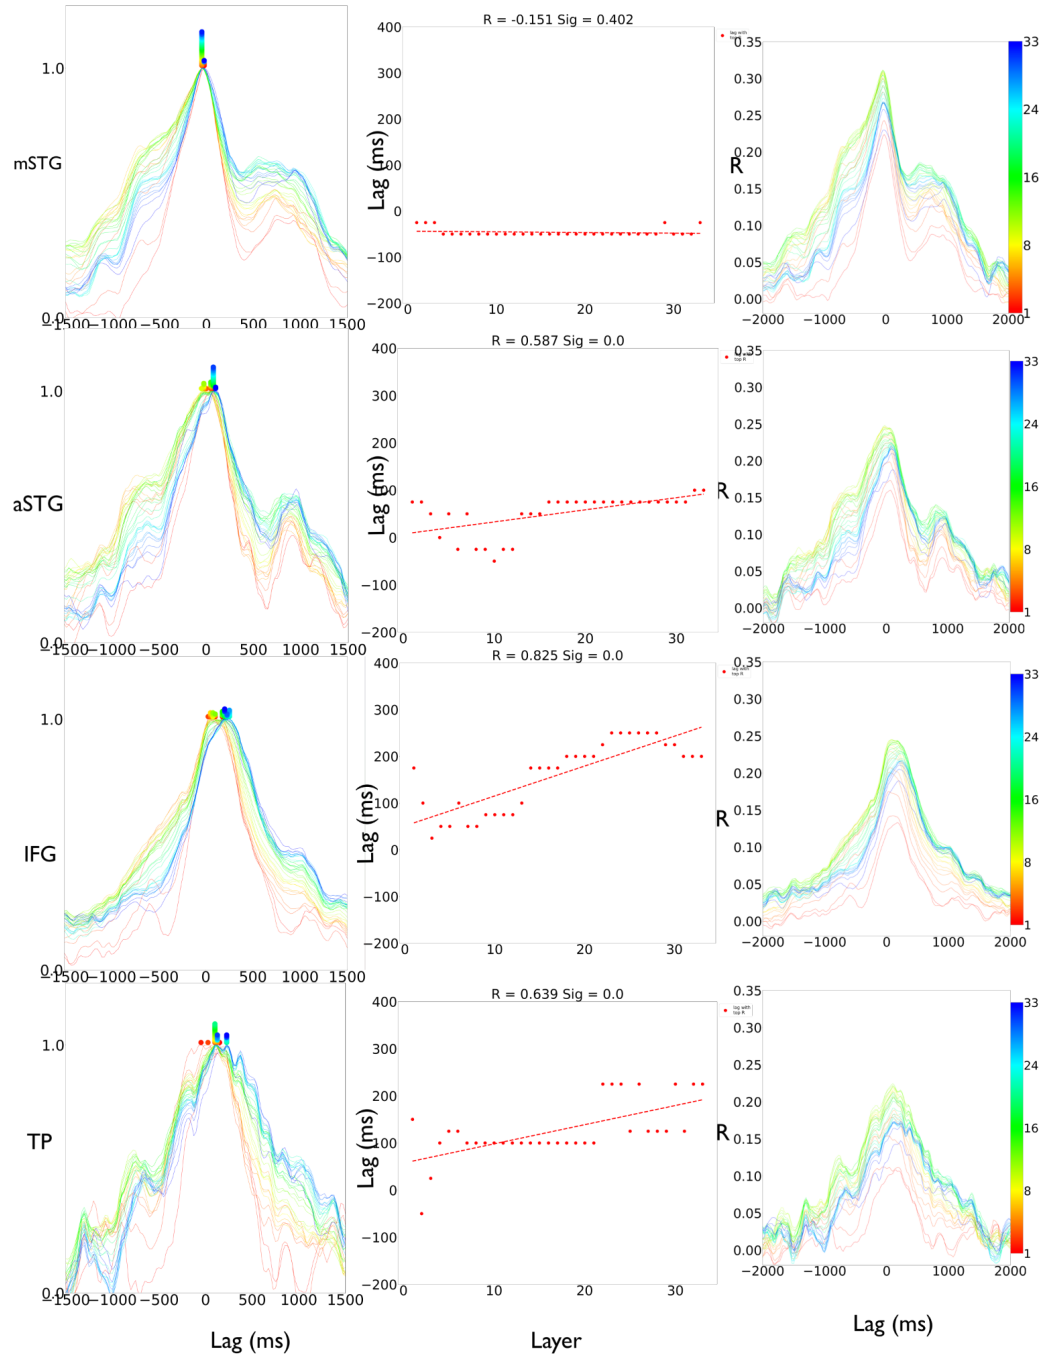

**Supplementary Figure S13:** Left to right: Scaled encoding, lag-layer and regular encoding plots for LLaMA 7b embeddings across ROIs. The words used to train the encoding model were the predictable words for GPT2-XL.

Table 4: Patient demographic information

| Patient ID | Age | Gender | Ethnicity | Language                           |
|------------|-----|--------|-----------|------------------------------------|
| 798        | 24  | M      | White     | English                            |
| 763        | 42  | M      | Other     | English primary; Spanish secondary |
| 743        | 23  | F      | White     | English                            |
| 742        | 34  | F      | Hispanic  | English/Spanish                    |
| 741        | 24  | M      | White     | English                            |
| 723        | 25  | M      | White     | English                            |
| 717        | 48  | F      | Irish     | English                            |

**Supplementary Table T1: Patient demographic information.**

Table 1: Additional information about patient pathology and neuropsychological scores.

| NO. | Neuropsych Score                       | Pathology/Epilepsy type/Seizure Focus                                                                                                                                                                          | Implant                                      |
|-----|----------------------------------------|----------------------------------------------------------------------------------------------------------------------------------------------------------------------------------------------------------------|----------------------------------------------|
| 798 | VCI: 145 POI: 96<br>PSI: 86 WMI: 95    | Focal epilepsy arising from the left hemisphere with a broad focus involving the left temporal neocortex (superior, middle, inferior temporal gyri) left frontal operculum, inferior postcentral gyrus, insula | Left grid and strips                         |
| 763 | VCI: 87 POI: 123<br>PSI: 97 WMI: 89    | Left temporal lobe epilepsy. Ictal onsets localized to the left temporal lobe (perilesionally) and left posterior mesial temporal lobe.                                                                        | Left grid, strips, and depth electrodes      |
| 743 | VCI: 100 POI: 109<br>PSI: 92 WMI: 86   | Focal epilepsy localized to the left posterior insula and periopercular region at the frontoparietal junction.                                                                                                 | Left grid, strips, and depth electrodes      |
| 742 | not found                              | Probable focal epilepsy, not clearly lateralized or localized. ICEEG showed definitively that disabling clinical events were psychogenic non-epileptic attacks.                                                | Left grid, strips, and depth electrodes      |
| 741 | VCI: 96 POI: 79<br>PSI: 81 WMI: 86     | Left hemispheric multilobar epilepsy                                                                                                                                                                           | Left grid, strips, and depth electrodes      |
| 723 | not found                              | Bilateral mesial temporal lobe epilepsy                                                                                                                                                                        | Bilateral strips and depth electrodes        |
| 717 | VCI: 107 POI: 104<br>PSI: 111 WMI: 114 | Right anteromesial temporal lobe epilepsy. ICEEG localized ictal onsets to the right temporal pole and right hippocampus                                                                                       | Bilateral strips and depths, and a left grid |

**Supplementary Table T2: Patient clinical information.**
